# Supplementary material for: FunSPU: A versatile and adaptive multiple functional annotation-based association test of whole-genome sequencing data
Source: PubMed Central journal article supplement (PMC6508749; doi:10.1371/journal.pgen.1008081), 2019-04-29

**Supplemental Figure S4.** Heritability per SNV ( $h^2/\#\text{SNV}$ ) of SBP sorted by category of functional annotation score (TWINSUK cohort). Dashed lines represent linear regression results (categories merged).

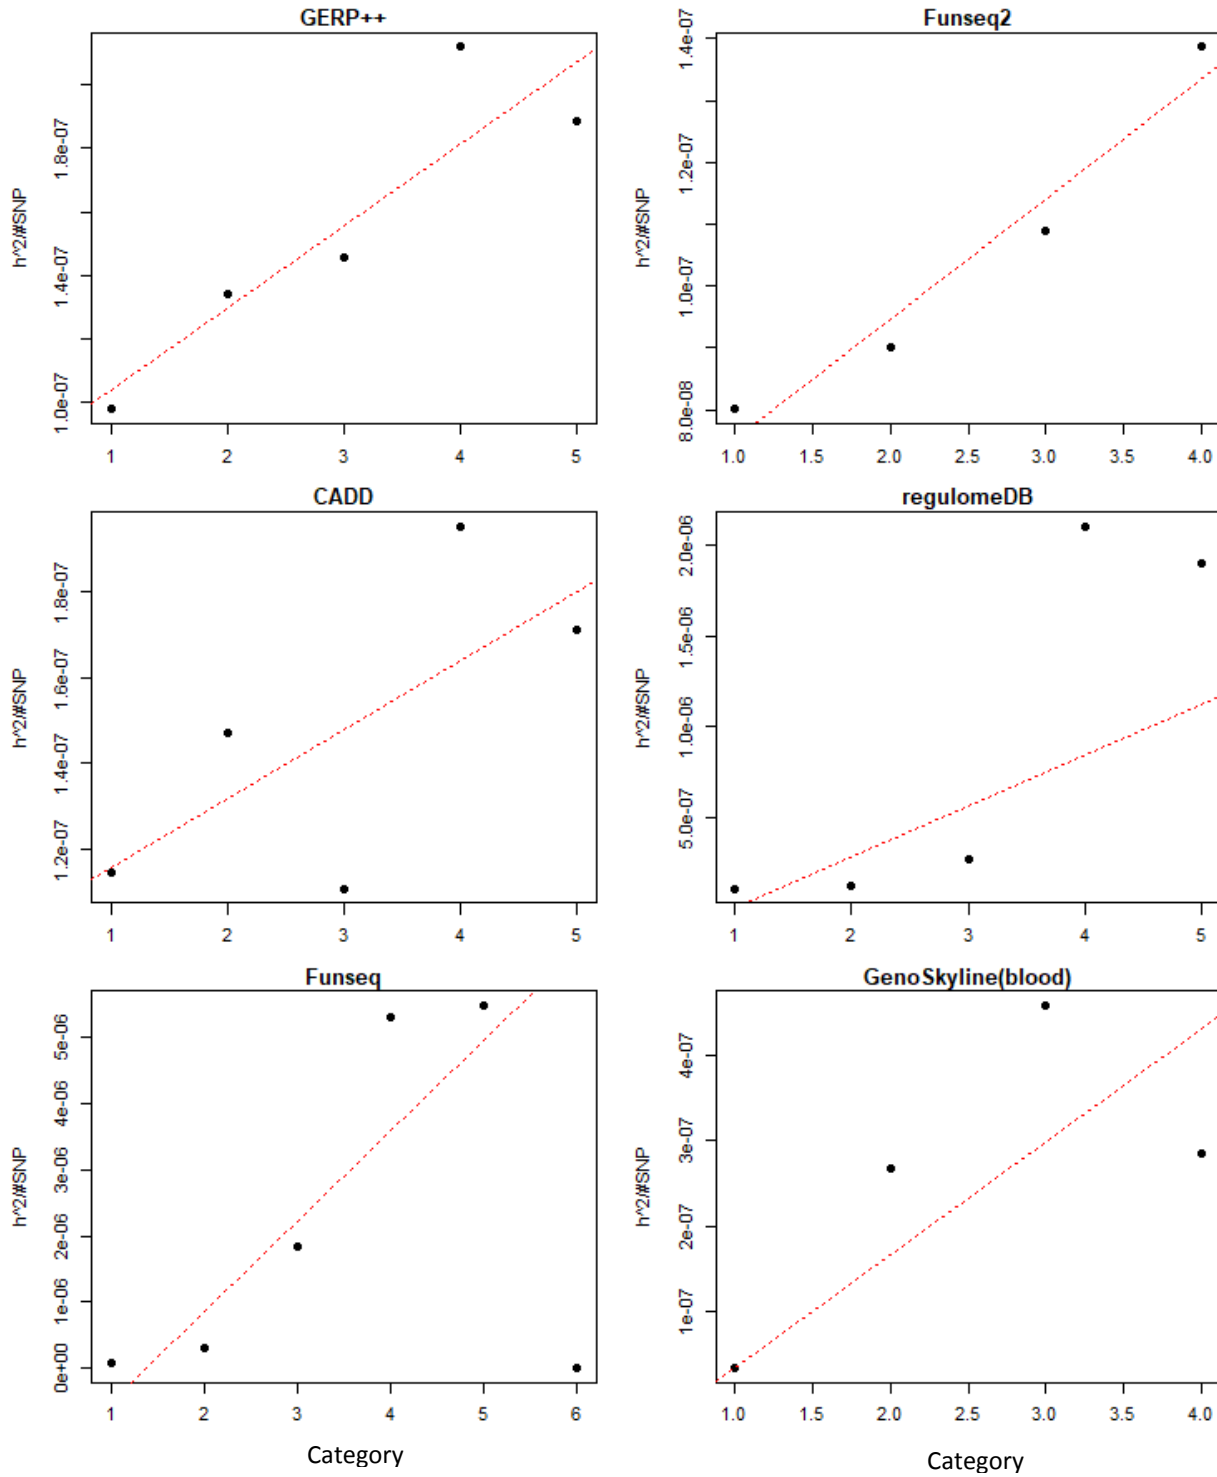

Supplement: pgen.1008081.s004.pdf [file pgen.1008081.s004.pdf]
