# Supplementary material for: FunSPU: A versatile and adaptive multiple functional annotation-based association test of whole-genome sequencing data
Source: PubMed Central journal article supplement (PMC6508749; doi:10.1371/journal.pgen.1008081), 2019-04-29

**Supplemental Figure S5.** Distributions of genome-wide functional scores for rare variants (MAF < 5%) in the UK10K TWINSUK cohort.

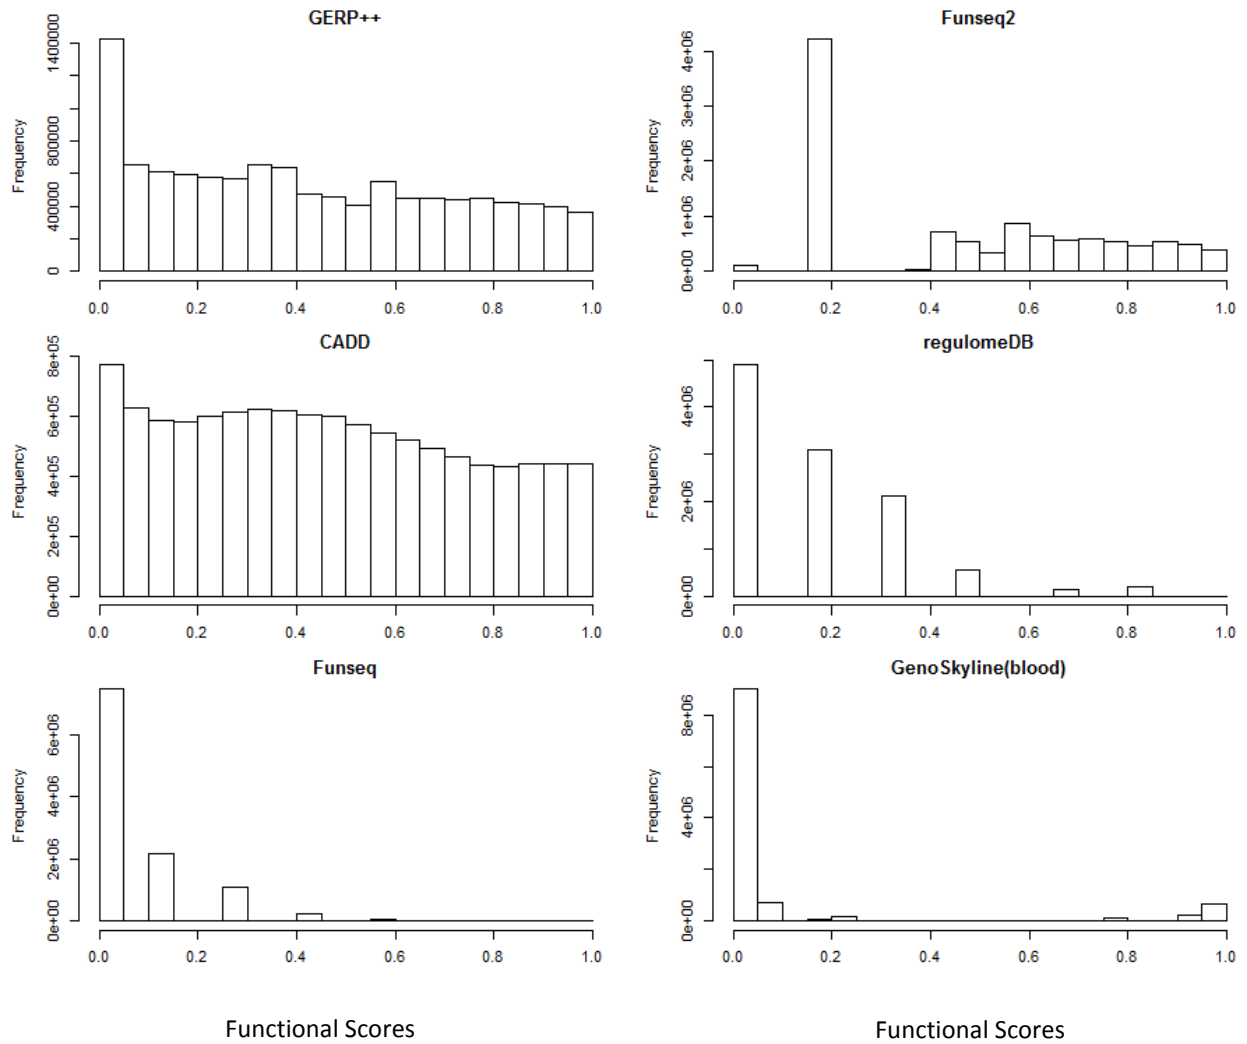

Supplement: pgen.1008081.s005.pdf [file pgen.1008081.s005.pdf]
