# Supplementary material for: FunSPU: A versatile and adaptive multiple functional annotation-based association test of whole-genome sequencing data
Source: PubMed Central journal article supplement (PMC6508749; doi:10.1371/journal.pgen.1008081), 2019-04-29

**Supplemental Figure S6.** Pairwise correlation of rescaled scores of functional annotations across the whole genome. The correlation plot was generated by R package corrplot.

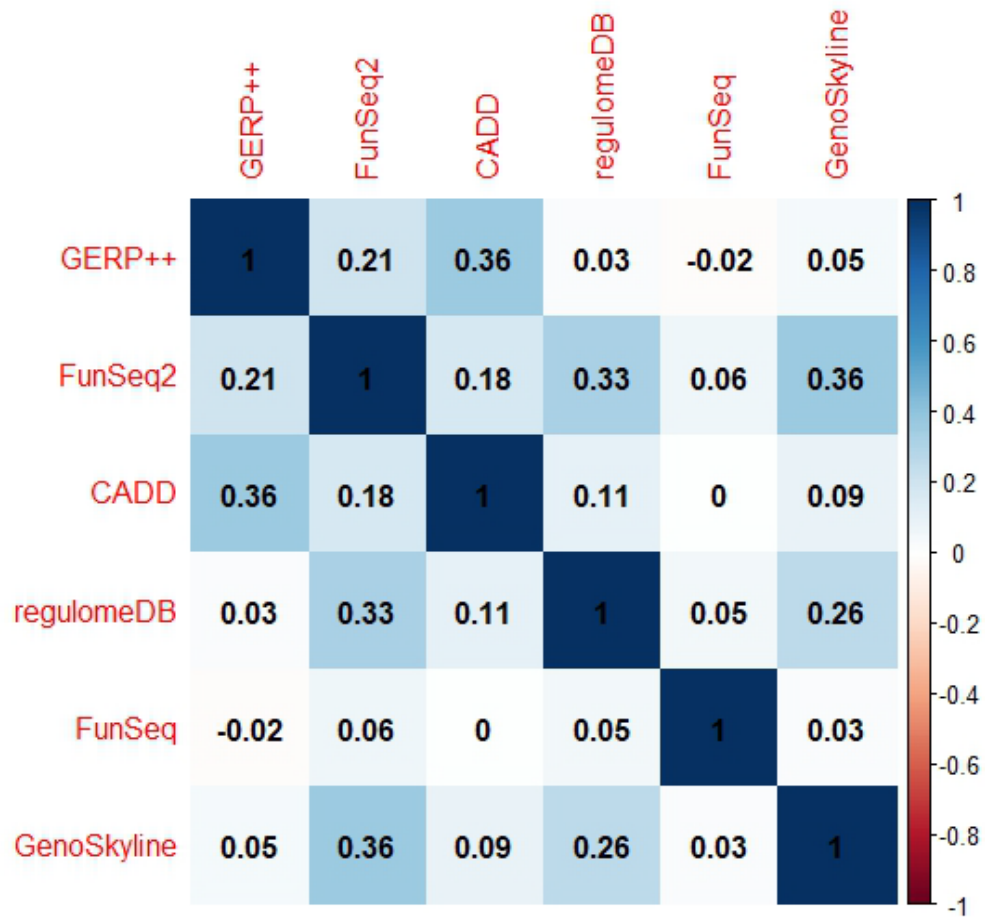

Supplement: pgen.1008081.s006.pdf [file pgen.1008081.s006.pdf]
