# Supplementary material for: FunSPU: A versatile and adaptive multiple functional annotation-based association test of whole-genome sequencing data
Source: PubMed Central journal article supplement (PMC6508749; doi:10.1371/journal.pgen.1008081), 2019-04-29

**Supplemental Figure S7.** Global quantile-quantile (QQ) plots for association analysis of rare variants with HDL in the UK10K TWINSUK cohort: (a) FunSPU (genomic control  $\lambda = 1.004$ ), (b) FunSPUw ( $\lambda = 1.076$ ), (c) wtFunSPU with global weights ( $\lambda = 1.004$ ), and (d) wtFunSPUw with global weights ( $\lambda = 1.047$ ).

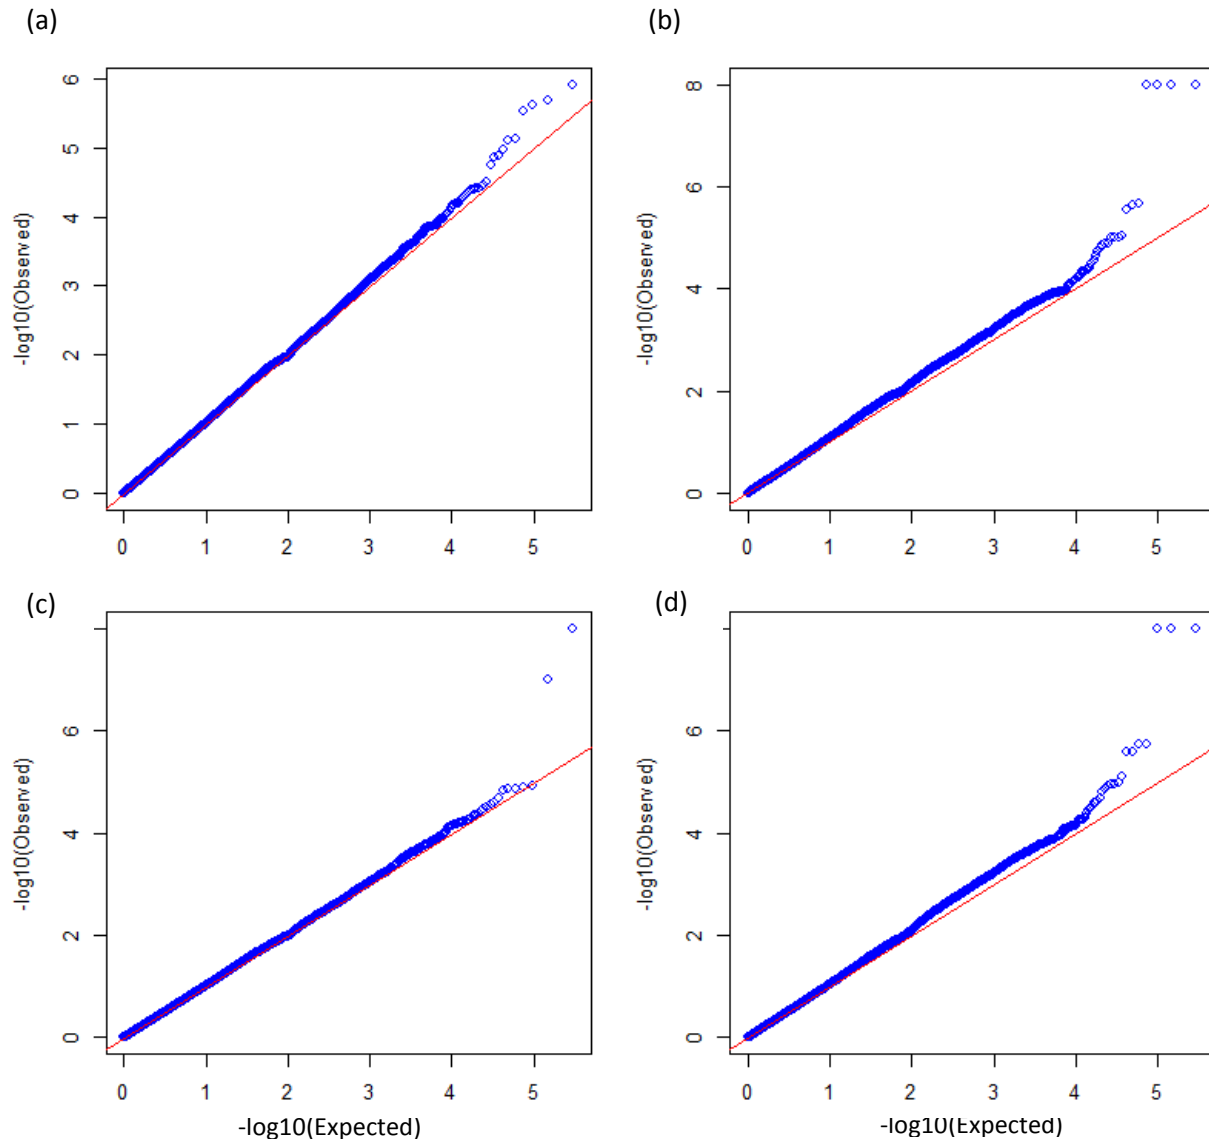

Supplement: pgen.1008081.s007.pdf [file pgen.1008081.s007.pdf]
