# Supplementary material for: FunSPU: A versatile and adaptive multiple functional annotation-based association test of whole-genome sequencing data
Source: PubMed Central journal article supplement (PMC6508749; doi:10.1371/journal.pgen.1008081), 2019-04-29

**Supplemental Figure S10.** Global QQ plots for association analysis of rare variants with SBP in the UK10K TWINSUK cohort: (a) FunSPU (genomic control  $\lambda = 0.601$ ), (b) FunSPUw ( $\lambda = 0.821$ ), (c) wtFunSPU with global weights ( $\lambda = 0.631$ ), and (d) wt-FunSPUw with global weights ( $\lambda = 0.793$ ).

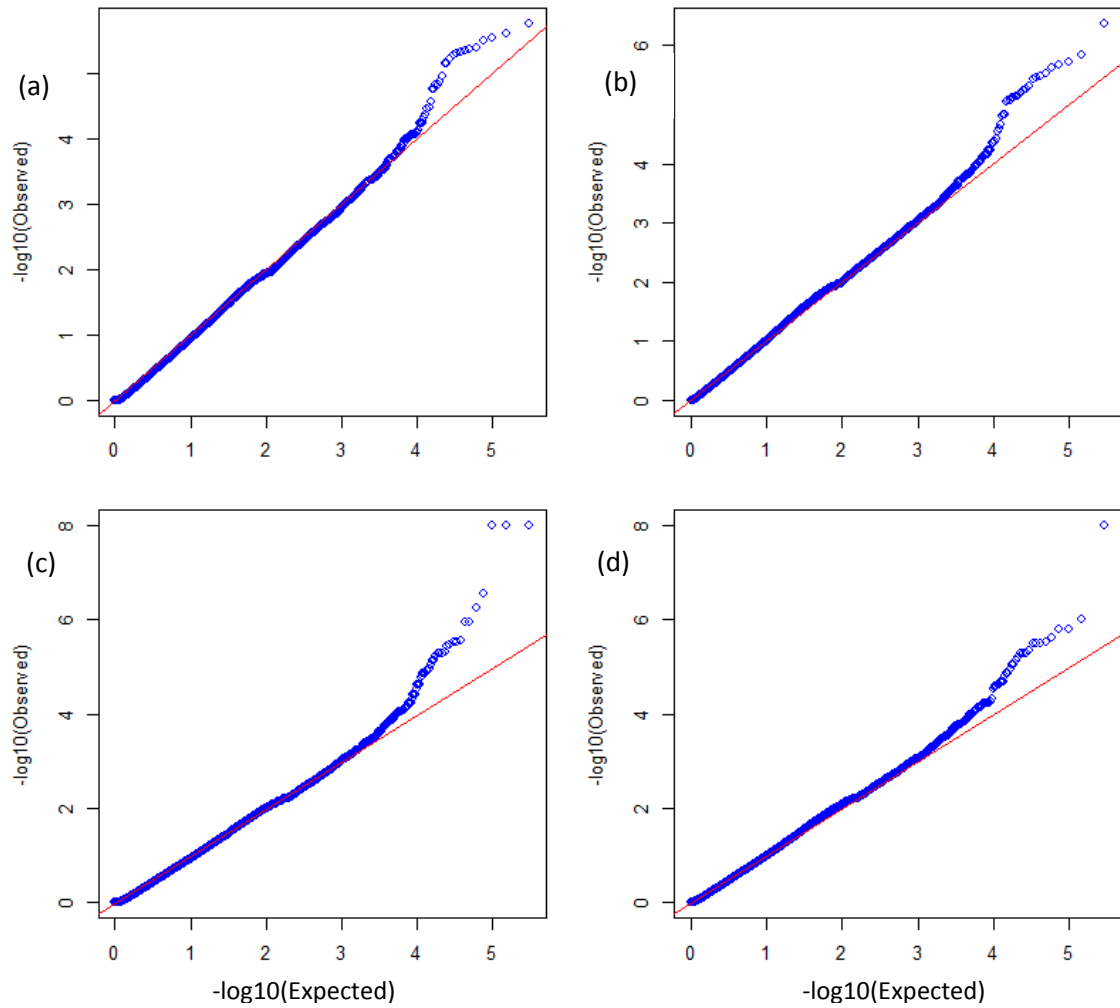

Supplement: pgen.1008081.s010.pdf [file pgen.1008081.s010.pdf]
