# Supplementary material for: FunSPU: A versatile and adaptive multiple functional annotation-based association test of whole-genome sequencing data
Source: PubMed Central journal article supplement (PMC6508749; doi:10.1371/journal.pgen.1008081), 2019-04-29

**Supplemental Figure S11.** LocusZoom plots of association test results for LDL at the locus around *TOMM40* and *APOC4-APOC2* in the UK10K TWINSUK cohort: (A) FunSPU, (B) wtFunSPU incorporating global weights, (C) aSPU, (D)-(I) aSPU incorporating a single functional annotation: (D) GERP++, (E) Funseq2, (F) CADD, (G) Funseq, (H) RegulomeDB, and (I) GenoSkyline (blood).

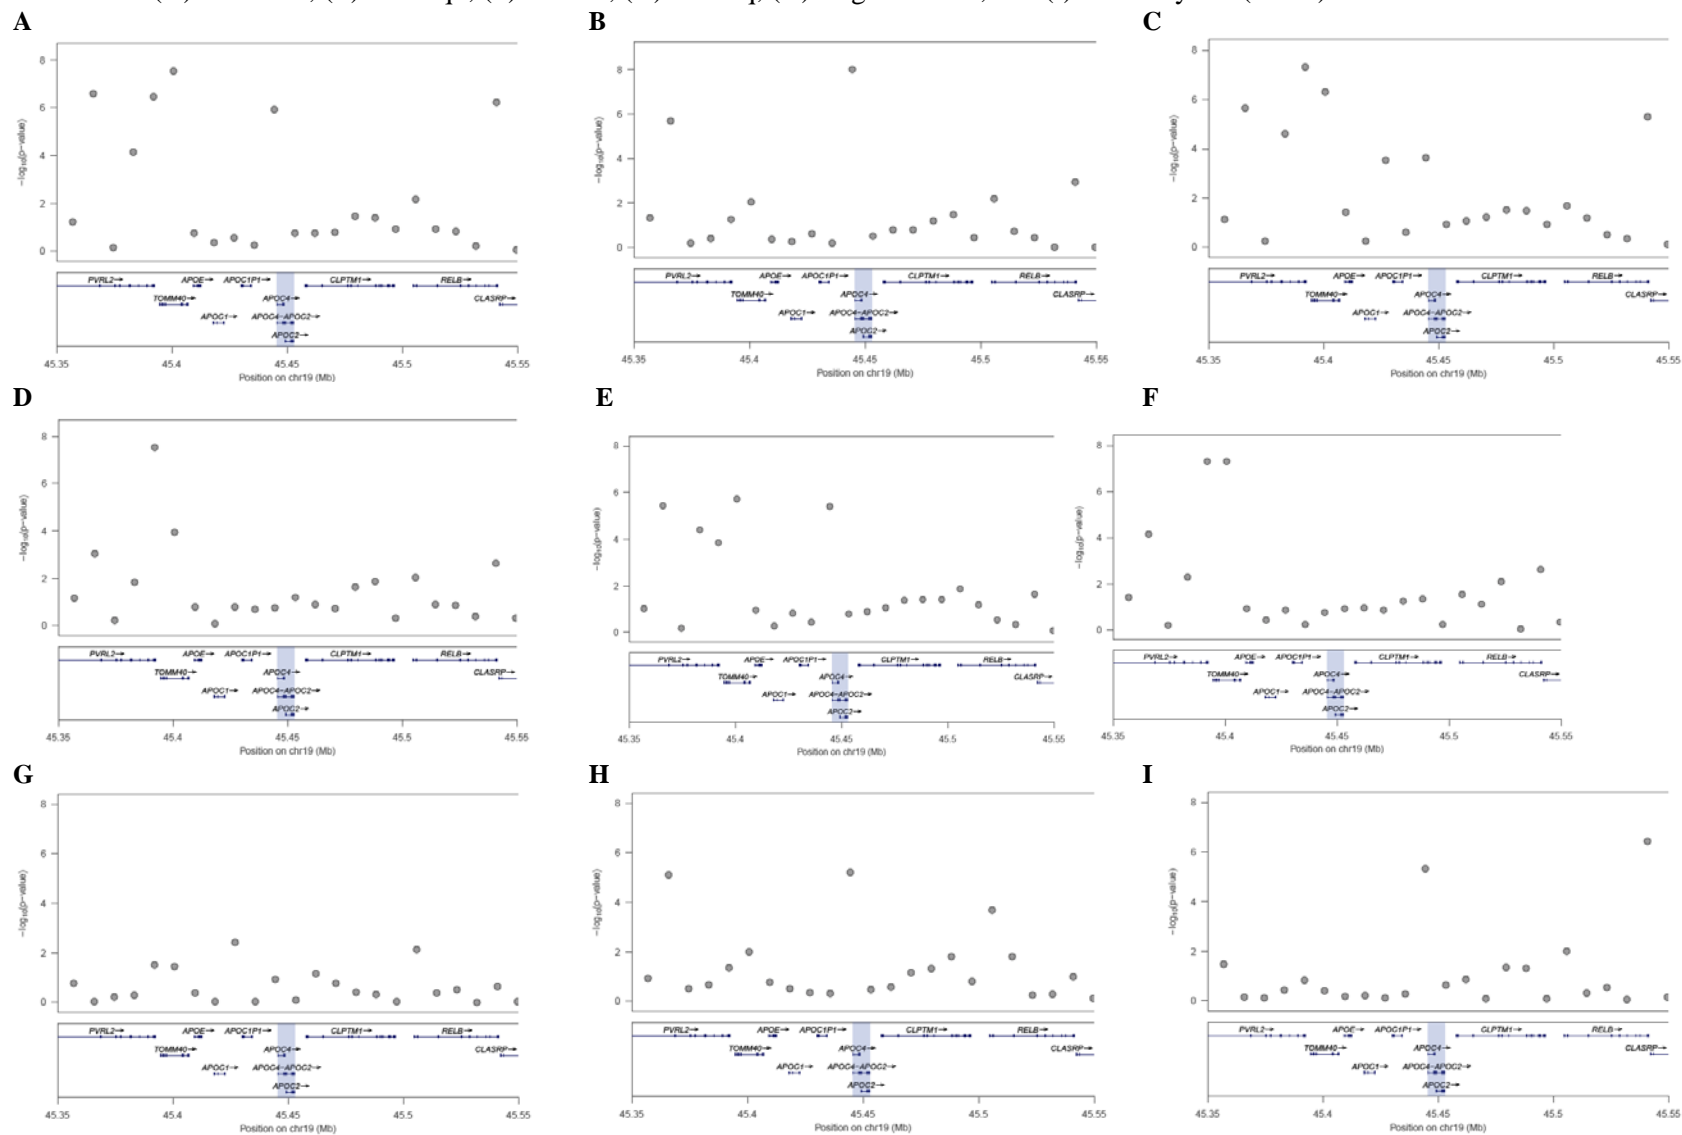

Supplement: pgen.1008081.s011.pdf [file pgen.1008081.s011.pdf]
