# Supplementary material for: FunSPU: A versatile and adaptive multiple functional annotation-based association test of whole-genome sequencing data
Source: PubMed Central journal article supplement (PMC6508749; doi:10.1371/journal.pgen.1008081), 2019-04-29

**Supplemental Figure S12.** Association test results for coding rare variants (MAF < 5%) in association with LDL around genes *TOMM40*, *APOE*, and *APOC4-APOC2*. Red dots correspond to  $-\log_{10}(\text{aSPU p-value})$ , and blank dots mark the locations of nonsynonymous rare variants. Dashed line indicates the threshold of genome-wide significance level ( $p < 1.56e-7$ ).

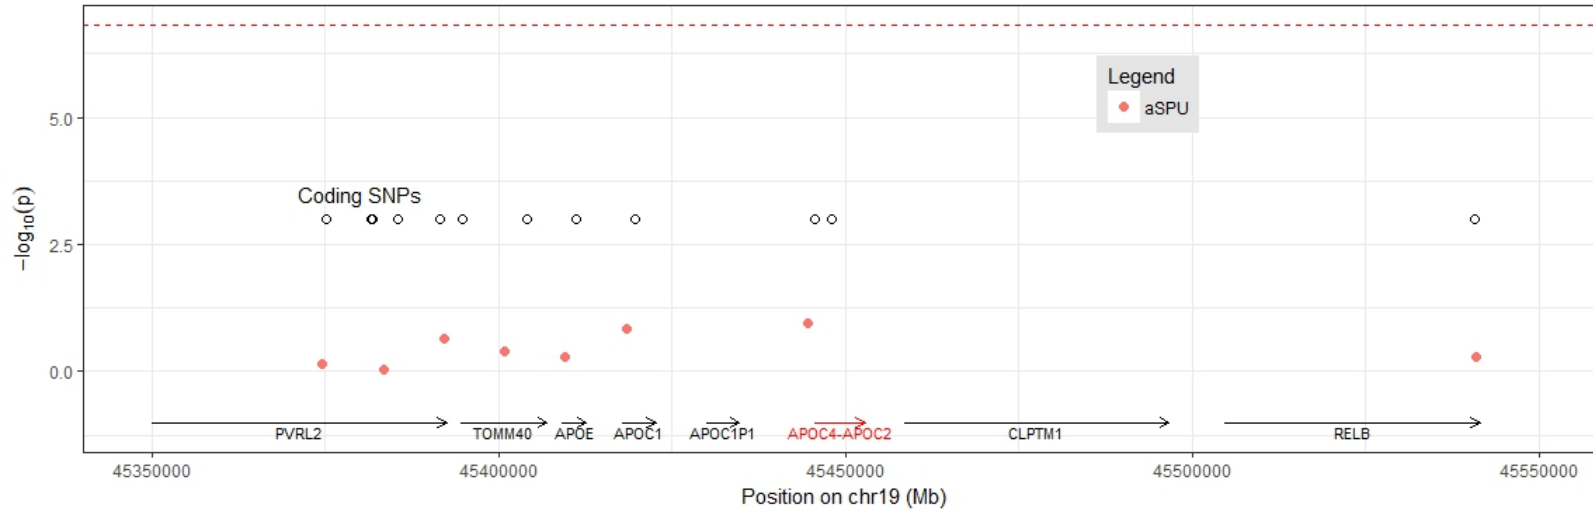

Supplement: pgen.1008081.s012.pdf [file pgen.1008081.s012.pdf]
