# Supplementary material for: FunSPU: A versatile and adaptive multiple functional annotation-based association test of whole-genome sequencing data
Source: PubMed Central journal article supplement (PMC6508749; doi:10.1371/journal.pgen.1008081), 2019-04-29
Supplement: pgen.1008081.s013.pdf [file pgen.1008081.s013.pdf]

**Supplemental Table S1.** Computational time needed (mean and standard deviation (SD) with 32 rare variants (RVs) in an RV-set) for selected methods under comparison in the simulation study of power (Figure 1; Scenario A for power evaluation).

| Computation time (in seconds) | Mean  | SD    |
|-------------------------------|-------|-------|
| aSPU                          | 0.268 | 0.054 |
| aSPU_minP                     | 1.923 | 0.118 |
| FunSPU                        | 0.804 | 0.070 |
| SKAT                          | 0.033 | 0.022 |
| Burden (T1)                   | 0.024 | 0.015 |
