# Supplementary material for: FunSPU: A versatile and adaptive multiple functional annotation-based association test of whole-genome sequencing data
Source: PubMed Central journal article supplement (PMC6508749; doi:10.1371/journal.pgen.1008081), 2019-04-29
Supplement: pgen.1008081.s014.pdf [file pgen.1008081.s014.pdf]

**Supplemental Table S2.** List of heritability of RVs by each category of functional annotation

(TWINSUK cohort). The *italicized* categories of each annotation were merged as one category. The corresponding phenotypes: (A) HDL, (B) LDL, (C) BMI, and (D) SBP

(A) High-density lipoprotein (HDL)

| Annotation          | value | h <sup>2</sup> (RV) | #SNV          | h <sup>2</sup> /#SNV | Normalized (by GERP++=1) | Regression Slopes |
|---------------------|-------|---------------------|---------------|----------------------|--------------------------|-------------------|
| GERP++              | 1     | 0.391               | 2610225       | 1.497E-07            | 1.000                    | 0.204             |
|                     | 2     | 0.454               | 2432456       | 1.868E-07            | 1.247                    |                   |
|                     | 3     | 0.399               | 1878023       | 2.125E-07            | 1.419                    |                   |
|                     | 4     | 0.401               | 1781008       | 2.253E-07            | 1.504                    |                   |
|                     | 5     | 0.455               | 1603753       | 2.834E-07            | 1.893                    |                   |
| Funseq2             | 1     | 0.346               | 4208678       | 8.224E-08            | 0.549                    | 0.177             |
|                     | 2     | 0.484               | 2483215       | 1.949E-07            | 1.302                    |                   |
|                     | 3     | 0.396               | 2311991       | 1.714E-07            | 1.145                    |                   |
|                     | 4     | 0.332               | 1861326       | 1.784E-07            | 1.191                    |                   |
| CADD                | 1     | 0.410               | 2563253       | 1.600E-07            | 1.068                    | 0.238             |
|                     | 2     | 0.427               | 2446753       | 1.744E-07            | 1.165                    |                   |
|                     | 3     | 0.416               | 2310764       | 1.801E-07            | 1.203                    |                   |
|                     | 4     | 0.420               | 1905380       | 2.204E-07            | 1.472                    |                   |
|                     | 5     | 0.552               | 1752877       | 3.149E-07            | 2.103                    |                   |
| RegulomeDB          | 1     | 0.438               | 3083174       | 1.420E-07            | 0.948                    | 2.502             |
|                     | 2     | 0.495               | 2111757       | 2.345E-07            | 1.566                    |                   |
|                     | 3     | <i>0.417</i>        | <i>556547</i> | <i>7.497E-07</i>     | <i>5.006</i>             |                   |
|                     | 4     | <i>0.423</i>        | <i>136034</i> | <i>3.110E-06</i>     | <i>20.770</i>            |                   |
|                     | 5     | <i>0.224</i>        | <i>187380</i> | <i>1.196E-06</i>     | <i>7.988</i>             |                   |
| Funseq              | 1     | 0.487               | 4990794       | 9.759E-08            | 0.652                    | 15.170            |
|                     | 2     | 0.470               | 1080633       | 4.347E-07            | 2.903                    |                   |
|                     | 3     | 0.412               | 228382        | 1.805E-06            | 12.054                   |                   |
|                     | 4     | <i>0.313</i>        | <i>29950</i>  | <i>1.044E-05</i>     | <i>69.685</i>            |                   |
|                     | 5     | <i>0.000</i>        | <i>5027</i>   | <i>1.989E-10</i>     | <i>0.001</i>             |                   |
|                     | 6     | <i>0.000</i>        | <i>280</i>    | <i>3.571E-09</i>     | <i>0.024</i>             |                   |
| GenoSkyline (blood) | 1     | 0.459               | 9702179       | 4.726E-08            | 0.316                    | 5.359             |
|                     | 2     | <i>0.212</i>        | <i>245856</i> | <i>8.643E-07</i>     | <i>5.772</i>             |                   |
|                     | 3     | <i>0.147</i>        | <i>120694</i> | <i>1.222E-06</i>     | <i>8.159</i>             |                   |
|                     | 4     | <i>0.348</i>        | <i>910298</i> | <i>3.820E-07</i>     | <i>2.551</i>             |                   |

## (B) Low-density lipoprotein (LDL)

| Annotation          | value | h <sup>2</sup> (RV) | #SNV    | h <sup>2</sup> /#SNV | Normalized (by GERP++=1) | Regression Slopes |
|---------------------|-------|---------------------|---------|----------------------|--------------------------|-------------------|
| GERP++              | 1     | 0.349               | 2610225 | 1.339E-07            | 1.000                    | 0.046             |
|                     | 2     | 0.406               | 2432456 | 1.669E-07            | 1.246                    |                   |
|                     | 3     | 0.371               | 1878023 | 1.974E-07            | 1.474                    |                   |
|                     | 4     | 0.275               | 1781008 | 1.545E-07            | 1.154                    |                   |
|                     | 5     | 0.274               | 1603753 | 1.709E-07            | 1.276                    |                   |
| Funseq2             | 1     | 0.276               | 4208678 | 6.556E-08            | 0.490                    | 0.154             |
|                     | 2     | 0.362               | 2483215 | 1.456E-07            | 1.087                    |                   |
|                     | 3     | 0.299               | 2311991 | 1.292E-07            | 0.965                    |                   |
|                     | 4     | 0.260               | 1861326 | 1.397E-07            | 1.043                    |                   |
| CADD                | 1     | 0.356               | 2563253 | 1.390E-07            | 1.038                    | 0.066             |
|                     | 2     | 0.373               | 2446753 | 1.526E-07            | 1.139                    |                   |
|                     | 3     | 0.284               | 2310764 | 1.229E-07            | 0.918                    |                   |
|                     | 4     | 0.349               | 1905380 | 1.833E-07            | 1.369                    |                   |
|                     | 5     | 0.294               | 1752877 | 1.677E-07            | 1.252                    |                   |
| RegulomeDB          | 1     | 0.281               | 3083174 | 9.120E-08            | 0.681                    | 3.419             |
|                     | 2     | 0.368               | 2111757 | 1.744E-07            | 1.302                    |                   |
|                     | 3     | 0.457               | 556547  | 8.208E-07            | 6.130                    |                   |
|                     | 4     | 0.423               | 136034  | 3.106E-06            | 23.196                   |                   |
|                     | 5     | 0.343               | 187380  | 1.829E-06            | 13.662                   |                   |
| Funseq              | 1     | 0.357               | 4990794 | 7.161E-08            | 0.535                    | 3.162             |
|                     | 2     | 0.382               | 1080633 | 3.534E-07            | 2.639                    |                   |
|                     | 3     | 0.301               | 228382  | 1.319E-06            | 9.854                    |                   |
|                     | 4     | 0.051               | 29950   | 1.686E-06            | 12.595                   |                   |
|                     | 5     | 0.000               | 5027    | 1.989E-10            | 0.001                    |                   |
|                     | 6     | 0.008               | 280     | 2.986E-05            | 223.008                  |                   |
| GenoSkyline (blood) | 1     | 0.354               | 9702179 | 3.649E-08            | 0.273                    | 1.276             |
|                     | 2     | 0.173               | 245856  | 7.044E-07            | 5.261                    |                   |
|                     | 3     | 0.089               | 120694  | 7.349E-07            | 5.488                    |                   |
|                     | 4     | 0.221               | 910298  | 2.432E-07            | 1.817                    |                   |

## (C) Body mass index (BMI)

| Annotation          | value | h <sup>2</sup> (RV) | #SNV    | h <sup>2</sup> /#SNV | Normalized (by GERP++=1) | Regression Slopes |
|---------------------|-------|---------------------|---------|----------------------|--------------------------|-------------------|
| GERP++              | 1     | 0.126               | 2610225 | 4.838E-08            | 1.000                    | 0.231             |
|                     | 2     | 0.102               | 2432456 | 4.210E-08            | 0.870                    |                   |
|                     | 3     | 0.070               | 1878023 | 3.745E-08            | 0.774                    |                   |
|                     | 4     | 0.182               | 1781008 | 1.023E-07            | 2.115                    |                   |
|                     | 5     | 0.119               | 1603753 | 7.418E-08            | 1.533                    |                   |
| Funseq2             | 1     | 0.163               | 4208678 | 3.875E-08            | 0.801                    | -0.033            |
|                     | 2     | 0.158               | 2483215 | 6.346E-08            | 1.312                    |                   |
|                     | 3     | 0.000               | 2311991 | 4.325E-13            | 0.000                    |                   |
|                     | 4     | 0.102               | 1861326 | 5.458E-08            | 1.128                    |                   |
| CADD                | 1     | 0.103               | 2563253 | 4.012E-08            | 0.829                    | 0.154             |
|                     | 2     | 0.141               | 2446753 | 5.779E-08            | 1.194                    |                   |
|                     | 3     | 0.095               | 2310764 | 4.110E-08            | 0.849                    |                   |
|                     | 4     | 0.138               | 1905380 | 7.239E-08            | 1.496                    |                   |
|                     | 5     | 0.123               | 1752877 | 7.004E-08            | 1.448                    |                   |
| RegulomeDB          | 1     | 0.102               | 3083174 | 3.310E-08            | 0.684                    | 1.633             |
|                     | 2     | 0.156               | 2111757 | 7.404E-08            | 1.530                    |                   |
|                     | 3     | 0.060               | 556547  | 1.075E-07            | 2.223                    |                   |
|                     | 4     | 0.171               | 136034  | 1.255E-06            | 25.944                   |                   |
|                     | 5     | 0.000               | 187380  | 5.337E-12            | 0.000                    |                   |
| Funseq              | 1     | 0.126               | 4990794 | 2.516E-08            | 0.520                    | 5.423             |
|                     | 2     | 0.123               | 1080633 | 1.139E-07            | 2.354                    |                   |
|                     | 3     | 0.000               | 228382  | 4.379E-12            | 0.000                    |                   |
|                     | 4     | 0.000               | 29950   | 3.339E-11            | 0.001                    |                   |
|                     | 5     | 0.000               | 5027    | 1.989E-10            | 0.004                    |                   |
|                     | 6     | 0.038               | 280     | 1.363E-04            | 2816.763                 |                   |
| GenoSkyline (blood) | 1     | 0.129               | 9702179 | 1.328E-08            | 0.274                    | 0.940             |
|                     | 2     | 0.021               | 245856  | 8.593E-08            | 1.776                    |                   |
|                     | 3     | 0.058               | 120694  | 4.840E-07            | 10.004                   |                   |
|                     | 4     | 0.054               | 910298  | 5.914E-08            | 1.222                    |                   |

## (D) Systolic blood pressure (SBP)

| Annotation          | value | h <sup>2</sup> (RV) | #SNV    | h <sup>2</sup> /#SNV | Normalized (by GERP++=1) | Regression Slopes |
|---------------------|-------|---------------------|---------|----------------------|--------------------------|-------------------|
| GERP++              | 1     | 0.256               | 2610225 | 9.804E-08            | 1.000                    | 0.263             |
|                     | 2     | 0.327               | 2432456 | 1.343E-07            | 1.370                    |                   |
|                     | 3     | 0.273               | 1878023 | 1.456E-07            | 1.485                    |                   |
|                     | 4     | 0.377               | 1781008 | 2.117E-07            | 2.159                    |                   |
|                     | 5     | 0.302               | 1603753 | 1.884E-07            | 1.922                    |                   |
| Funseq2             | 1     | 0.337               | 4208678 | 8.015E-08            | 0.818                    | 0.198             |
|                     | 2     | 0.224               | 2483215 | 9.010E-08            | 0.919                    |                   |
|                     | 3     | 0.252               | 2311991 | 1.089E-07            | 1.111                    |                   |
|                     | 4     | 0.258               | 1861326 | 1.386E-07            | 1.413                    |                   |
| CADD                | 1     | 0.294               | 2563253 | 1.146E-07            | 1.169                    | 0.165             |
|                     | 2     | 0.360               | 2446753 | 1.470E-07            | 1.499                    |                   |
|                     | 3     | 0.256               | 2310764 | 1.108E-07            | 1.130                    |                   |
|                     | 4     | 0.372               | 1905380 | 1.954E-07            | 1.993                    |                   |
|                     | 5     | 0.300               | 1752877 | 1.713E-07            | 1.748                    |                   |
| RegulomeDB          | 1     | 0.358               | 3083174 | 1.161E-07            | 1.184                    | 2.840             |
|                     | 2     | 0.279               | 2111757 | 1.320E-07            | 1.346                    |                   |
|                     | 3     | 0.151               | 556547  | 2.716E-07            | 2.770                    |                   |
|                     | 4     | 0.285               | 136034  | 2.098E-06            | 21.400                   |                   |
|                     | 5     | 0.355               | 187380  | 1.895E-06            | 19.333                   |                   |
| Funseq              | 1     | 0.328               | 4990794 | 6.575E-08            | 0.671                    | 14.050            |
|                     | 2     | 0.328               | 1080633 | 3.031E-07            | 3.092                    |                   |
|                     | 3     | 0.420               | 228382  | 1.837E-06            | 18.736                   |                   |
|                     | 4     | 0.159               | 29950   | 5.318E-06            | 54.243                   |                   |
|                     | 5     | 0.028               | 5027    | 5.485E-06            | 55.948                   |                   |
|                     | 6     | 0.000               | 280     | 3.571E-09            | 0.036                    |                   |
| GenoSkyline (blood) | 1     | 0.329               | 9702179 | 3.387E-08            | 0.345                    | 1.349             |
|                     | 2     | 0.066               | 245856  | 2.668E-07            | 2.721                    |                   |
|                     | 3     | 0.055               | 120694  | 4.587E-07            | 4.679                    |                   |
|                     | 4     | 0.260               | 910298  | 2.861E-07            | 2.918                    |                   |
