# Supplementary material for: FunSPU: A versatile and adaptive multiple functional annotation-based association test of whole-genome sequencing data
Source: PubMed Central journal article supplement (PMC6508749; doi:10.1371/journal.pgen.1008081), 2019-04-29
Supplement: pgen.1008081.s015.pdf [file pgen.1008081.s015.pdf]

**Supplemental Table S3.** Summary and comparison of the proposed tests.

| Test           | Allow multiple functional annotations as weights? | Way to combine multiple annotations/weights                                                                          | Comment                                                                                                                                                                                         | recommended for genome-wide scan of WGS data |
|----------------|---------------------------------------------------|----------------------------------------------------------------------------------------------------------------------|-------------------------------------------------------------------------------------------------------------------------------------------------------------------------------------------------|----------------------------------------------|
| aSPU(w)*       | No                                                | N/A                                                                                                                  | an omnibus RV association test that covers the burden, SKAT, minP tests and beyond                                                                                                              | Yes                                          |
| aSPU(w)_minP   | Yes                                               | Minimum p-value of individual annotation-weighted aSPU                                                               | Closely related to the FST test (He et al, AJHG 2017)                                                                                                                                           | Yes                                          |
| aSPU(w)_Fisher | Yes                                               | Fisher's meta-analysis approach to combine p-values of individual annotation-weighted aSPU                           | Assuming all annotations are roughly equally informative; often less powerful than aSPU_minP                                                                                                    | No                                           |
| FunSPU(w)      | Yes                                               | two-layers of gamma parameters to control each variant's and annotation's contribution to the overall test statistic | more general than aSPU_minP and aSPU_Fisher; the main proposal here                                                                                                                             | Yes                                          |
| wtFunSPU(w)    | Yes                                               | FunSPU with a data-derived global weight for each annotation                                                         | When the global weighting is consistent with the relative informativeness of multiple annotations for a given locus, power gain is expected; otherwise, power loss can occur compared to FunSPU | Yes                                          |

\*: (w) indicates inverse-variance weighted score function in the SPU framework; variants with lower MAF are up-weighted.
