# Supplementary material for: FunSPU: A versatile and adaptive multiple functional annotation-based association test of whole-genome sequencing data
Source: PubMed Central journal article supplement (PMC6508749; doi:10.1371/journal.pgen.1008081), 2019-04-29
Supplement: pgen.1008081.s016.pdf [file pgen.1008081.s016.pdf]

**Supplemental Table S4.** List of heritability of common variants (CVs; MAF>5%) by each category of functional annotation (TWINSUK WGS cohort) estimated by LD score regression. The *italicized* categories of each annotation were merged as one category. The corresponding phenotypes: (A) HDL, (B) LDL

(A) HDL

| Annotation           | value | h <sup>2</sup> (CV) | Proportion of SNPs | h <sup>2</sup> /proportion of SNPs | Normalized (by GERP++=1) | Regression Slopes (common variants by LD score regression) | Regression Slopes (TWINSUK, rare variants by GCTA) |
|----------------------|-------|---------------------|--------------------|------------------------------------|--------------------------|------------------------------------------------------------|----------------------------------------------------|
| GERP++               | 1     | 0.247               | 0.206              | 1.202                              | 1.000                    | 0.597                                                      | 0.204                                              |
|                      | 2     | -0.025              | 0.197              | -0.128                             | -0.106                   |                                                            |                                                    |
|                      | 3     | -0.055              | 0.153              | -0.356                             | -0.296                   |                                                            |                                                    |
|                      | 4     | 0.442               | 0.138              | 3.194                              | 2.657                    |                                                            |                                                    |
|                      | 5     | 0.355               | 0.113              | 3.131                              | 2.605                    |                                                            |                                                    |
| Funseq2              | 1     | 0.076               | 0.352              | 0.217                              | 0.181                    | 0.890                                                      | 0.177                                              |
|                      | 2     | 0.139               | 0.200              | 0.695                              | 0.578                    |                                                            |                                                    |
|                      | 3     | 0.210               | 0.177              | 1.186                              | 0.987                    |                                                            |                                                    |
|                      | 4     | 0.478               | 0.132              | 3.618                              | 3.010                    |                                                            |                                                    |
| CADD                 | 1     | 0.249               | 0.221              | 1.126                              | 0.937                    | 0.506                                                      | 0.238                                              |
|                      | 2     | 0.034               | 0.213              | 0.159                              | 0.132                    |                                                            |                                                    |
|                      | 3     | 0.116               | 0.187              | 0.622                              | 0.518                    |                                                            |                                                    |
|                      | 4     | 0.151               | 0.138              | 1.096                              | 0.912                    |                                                            |                                                    |
|                      | 5     | 0.392               | 0.106              | 3.698                              | 3.076                    |                                                            |                                                    |
| RegulomeDB           | 1     | -0.166              | 0.254              | -0.655                             | -0.545                   | 2.833                                                      | 2.502                                              |
|                      | 2     | -0.017              | 0.158              | -0.111                             | -0.092                   |                                                            |                                                    |
|                      | 3,4,5 | 0.617               | 0.069              | 8.987                              | 7.477                    |                                                            |                                                    |
|                      |       |                     |                    |                                    |                          |                                                            |                                                    |
| Funseq               | 1     | 0.093               | 0.170              | 0.547                              | 0.455                    | 5.329                                                      | 15.170                                             |
|                      | 2     | 0.302               | 0.073              | 4.155                              | 3.457                    |                                                            |                                                    |
|                      | 3     | 0.041               | 0.013              | 3.255                              | 2.708                    |                                                            |                                                    |
|                      | 4,5,6 | 0.054               | 0.002              | 26.359                             | 21.929                   |                                                            |                                                    |
|                      |       |                     |                    |                                    |                          |                                                            |                                                    |
| Geno-Skyline (blood) | 1     | 0.564               | 0.775              | 0.728                              | 0.606                    | 1.422                                                      | 5.359                                              |
|                      | 2,3,4 | 0.377               | 0.091              | 4.146                              | 3.449                    |                                                            |                                                    |
|                      |       |                     |                    |                                    |                          |                                                            |                                                    |

## (B) LDL

| Annotation           | value | $h^2$ (CV) | Proportion of SNPs | $h^2$ /proportion of SNPs | Normalized (by GERP++=1) | Regression Slopes (common variants by LD score regression) | Regression Slopes (TWINSUK, rare variants by GCTA) |
|----------------------|-------|------------|--------------------|---------------------------|--------------------------|------------------------------------------------------------|----------------------------------------------------|
| GERP++               | 1     | 0.239      | 0.206              | 1.161                     | 1                        | 0.0589                                                     | 0.046                                              |
|                      | 2     | 0.344      | 0.197              | 1.745                     | 1.503                    |                                                            |                                                    |
|                      | 3     | 0.045      | 0.153              | 0.293                     | 0.253                    |                                                            |                                                    |
|                      | 4     | 0.232      | 0.138              | 1.679                     | 1.446                    |                                                            |                                                    |
|                      | 5     | 0.174      | 0.113              | 1.537                     | 1.323                    |                                                            |                                                    |
| Funseq2              | 1     | 0.041      | 0.352              | 0.118                     | 0.101                    | 0.9571                                                     | 0.154                                              |
|                      | 2     | 0.159      | 0.2                | 0.796                     | 0.686                    |                                                            |                                                    |
|                      | 3     | 0.249      | 0.177              | 1.411                     | 1.215                    |                                                            |                                                    |
|                      | 4     | 0.478      | 0.132              | 3.616                     | 3.115                    |                                                            |                                                    |
| CADD                 | 1     | 0.195      | 0.221              | 0.882                     | 0.76                     | 0.5924                                                     | 0.066                                              |
|                      | 2     | 0.104      | 0.213              | 0.487                     | 0.42                     |                                                            |                                                    |
|                      | 3     | 0.127      | 0.187              | 0.677                     | 0.583                    |                                                            |                                                    |
|                      | 4     | 0.126      | 0.138              | 0.915                     | 0.788                    |                                                            |                                                    |
|                      | 5     | 0.435      | 0.106              | 4.108                     | 3.538                    |                                                            |                                                    |
| Regulome DB          | 1     | -0.015     | 0.254              | -0.06                     | -0.052                   | 2.7101                                                     | 3.419                                              |
|                      | 2     | 0.181      | 0.158              | 1.146                     | 0.987                    |                                                            |                                                    |
|                      | 3,4,5 | 0.617      | 0.069              | 8.99                      | 7.744                    |                                                            |                                                    |
|                      |       |            |                    |                           |                          |                                                            |                                                    |
| Funseq               | 1     | -0.176     | 0.17               | -1.037                    | -0.893                   | 6.516                                                      | 3.162                                              |
|                      | 2     | 0.562      | 0.073              | 7.743                     | 6.67                     |                                                            |                                                    |
|                      | 3     | 0.008      | 0.013              | 0.643                     | 0.554                    |                                                            |                                                    |
|                      | 4,5,6 | 0.063      | 0.002              | 31.121                    | 26.806                   |                                                            |                                                    |
|                      |       |            |                    |                           |                          |                                                            |                                                    |
| Geno-Skyline (blood) | 1     | 0.615      | 0.775              | 0.086                     | 0.684                    | 1.416                                                      | 1.276                                              |
|                      | 2,3,4 | 0.371      | 0.091              | 0.773                     | 3.516                    |                                                            |                                                    |
|                      |       |            |                    |                           |                          |                                                            |                                                    |
|                      |       |            |                    |                           |                          |                                                            |                                                    |
